1 **Characterization of neutralizing versus binding antibodies and memory B cells in COVID-19**  
2 **recovered individuals from India**

3 Kaustuv Nayak<sup>a#</sup>, Kamalishnu Gottimukkala<sup>a#</sup>, Sanjeev Kumar<sup>a#</sup>, Elluri Seetharami Reddy<sup>a,b#</sup>,  
4 Venkata Viswanadh Edara<sup>c,d,e</sup>, Robert Kauffman<sup>c,d</sup> Katharine Floyd<sup>c,d,e</sup>, Grace Mantus<sup>c,d</sup>, Deepali  
5 Savargaonkar<sup>f</sup>, Pawan Kumar Goel<sup>g</sup>, Satyam Arora<sup>h</sup>, Manju Rahi<sup>i</sup>, Carl W Davis<sup>c,j</sup>, Susanne Linderman<sup>c,d</sup>,  
6 Jens Wrammert<sup>c,d</sup>, Mehul S Suthar<sup>c,d,e</sup>, Rafi Ahmed<sup>c,j</sup> Amit Sharma<sup>f,k</sup>, Kaja Murali-Krishna <sup>a,c,d§</sup>, Anmol  
7 Chandele<sup>a§</sup>

8  
9 <sup>a</sup> ICGEB-Emory Vaccine Center, International Center for Genetic Engineering and Biotechnology,  
10 Aruna Asaf Ali Marg, New Delhi, India.

11 <sup>b</sup> Kasuma School of Biological Sciences, Indian Institute of Technology, New Delhi, India

12 <sup>c</sup> Emory Vaccine Center, Emory University, Atlanta, GA 30322,USA.

13 <sup>d</sup> Department of Pediatrics, Emory University School of Medicine, Emory University, Atlanta, GA  
14 30322, USA.

15 <sup>e</sup> Yerkes National Primate Research Center, Atlanta, GA 30329, USA.

16 <sup>f</sup> ICMR-National Institute of Malaria Research, Dwarka, New Delhi, India.

17 <sup>g</sup> Shaheed Hasan Khan Mewat Government Medical College, Nalhar, Mewat, Haryana, India

18 <sup>h</sup> Department of Transfusion Medicine, Super Speciality Pediatric Hospital and Post Graduate  
19 Teaching Institute, Noida, UP, India.

20 <sup>i</sup> Division of Epidemiology and Communicable Diseases, Indian Council of Medical Research, New  
21 Delhi, India.

22 <sup>j</sup> Dept of Microbiology and Immunology, Emory University School of Medicine, Emory University,  
23 Atlanta, GA 30322, USA.

24 <sup>k</sup> Structural Parasitology Group, International Centre for Genetic Engineering and Biotechnology,  
25 Aruna Asaf Ali Marg, New Delhi, India.

26

27

28 # Equal contributors / first authors

29 § Equal corresponding authors

30

31 **Keywords:**

32 SARS-CoV-2, COVID-19, Receptor Binding Domain, Neutralizing antibodies, Memory B cells, India.

33

34 **Running title:**

35 Humoral and B cell memory in COVID-19 recovered individuals from India

36

37 **Address for correspondence**

38

39 Kaja Murali-Krishna,

40 Dept of Pediatrics, 2015 Upper gate Drive, Emory University School of Medicine, Emory University,

41 Atlanta, GA 30322,USA.

42 [Murali.kaja@emory.edu](mailto:Murali.kaja@emory.edu)

43

44 Anmol Chandele,

45 ICGEB-Emory Vaccine Center, International Center for Genetic Engineering and Biotechnology,

46 Aruna Asaf Ali Marg, New Delhi, India.

47 [chandeleanmol@gmail.com](mailto:chandeleanmol@gmail.com)

48 **Abstract**

49

50 India is one of the countries most affected by the recent COVID-19 pandemic.  
51 Characterization of humoral responses to SARS-CoV-2 infection, including immunoglobulin  
52 isotype usage, neutralizing activity and memory B cell generation, is necessary to provide  
53 critical insights on the formation of immune memory in Indian subjects. In this study, we  
54 evaluated SARS-CoV-2 receptor-binding domain (RBD)-specific IgG, IgM, and IgA antibody  
55 responses, neutralization of live virus, and RBD-specific memory B cell responses in pre-  
56 pandemic healthy versus convalescent COVID-19 individuals from India. We observed  
57 substantial heterogeneity in the formation of humoral and B cell memory post COVID-19  
58 recovery. While a vast majority (38/42, 90.47%) of COVID-19 recovered individuals  
59 developed SARS-CoV-2 RBD-specific IgG responses, only half of them had appreciable  
60 neutralizing antibody titers. RBD-specific IgG titers correlated with these neutralizing  
61 antibody titers as well as with RBD-specific memory B cell frequencies. In contrast, IgG titers  
62 measured against SARS-CoV-2 whole virus preparation, which includes responses to  
63 additional viral proteins besides RBD, did not show robust correlation. Our results suggest  
64 that assessing RBD-specific IgG titers can serve as a surrogate assay to determine the  
65 neutralizing antibody response. These observations have timely implications for identifying  
66 potential plasma therapy donors based on RBD-specific IgG in resource-limited settings  
67 where routine performance of neutralization assays remains a challenge.

68

69

70

71 **Importance**

72

73 Our study provides an understanding of SARS-CoV-2-specific neutralizing antibodies,  
74 binding antibodies and memory B cells in COVID-19 convalescent subjects from India. Our  
75 study highlights that PCR-confirmed convalescent COVID-19 individuals develop SARS-CoV-  
76 2 RBD-specific IgG antibodies, which correlate strongly with their neutralizing antibody  
77 titers. RBD-specific IgG titers, thus, can serve as a valuable surrogate measurement for  
78 neutralizing antibody responses. These finding have timely significance for selection of  
79 appropriate individuals as donors for plasma intervention strategies, as well as determining  
80 vaccine efficacy.

## 81 **Introduction**

82

83 Severe acute respiratory syndrome coronavirus-2 (SARS-CoV-2), the virus responsible for  
84 the coronavirus disease 2019 (COVID-19) pandemic, emerged as a grave public health threat  
85 beginning in December 2019(1), paralyzing daily lives and causing economic downturns in  
86 many parts of the world. Currently, India is one of the countries most affected with more  
87 than 3 million COVID-19 confirmed cases and 60,000 associated deaths (2).

88

89 Intense efforts are underway to develop vaccines and antiviral therapeutics (3-11). These  
90 efforts require a detailed understanding of immune correlates of protection, formation of  
91 immune memory, and durability of these responses. Additionally, infusion of plasma derived  
92 from COVID-19 recovered individuals is also being explored as a treatment strategy (12-20).  
93 All these efforts require a detailed understanding of humoral immunity, immunoglobulin  
94 isotype usage and neutralizing activity following recovery from SARS-CoV-2 infection.  
95 Moreover, given that many of the SARS-CoV-2 neutralizing epitopes are located in the viral  
96 receptor binding domain (RBD) of the Spike (S) protein (21-29), it is important to evaluate  
97 the relationship between RBD-specific IgG titers and neutralizing antibody responses.

98

99 In this study, we evaluated IgG, IgA, IgM, neutralizing antibodies and memory B cell  
100 responses in PCR-confirmed COVID-19 convalescent subjects. Our results show that while a  
101 vast majority (38/42, 90.47%) of COVID-19 recovered individuals developed SARS-CoV-2  
102 RBD-specific IgG responses, we were able to detect appreciable levels of neutralizing  
103 antibody responses in only half of the convalescent subjects. Neutralizing responses

104 correlated closely with RBD-specific IgG titers, but weakly with IgG titers measured against  
105 crude virus concentrate using a commercial ELISA kit. Taken together, these findings suggest  
106 that despite significant inter-individual variation in the RBD-specific IgG titers and  
107 neutralizing antibodies, RBD-specific IgG titers can serve as a valuable and robust surrogate  
108 measurement for neutralizing antibody responses. These observations not only provide a  
109 glimpse of humoral immune responses in COVID-19 recovered individuals from India, but  
110 also have timely implications for identifying potential plasma therapy donors using on RBD-  
111 specific IgG ELISA's in India where routine performance of neutralization assays remains a  
112 challenge.

## 113 **Methods**

114

### 115 ***Subject recruitment***

116 COVID-19 recovered individuals were recruited at Shaheed Hasan Khan Mewati Government  
117 Medical College, Nuh, Haryana, India, Super Specialty Pediatric Hospital and Post Graduate  
118 Teaching Institute, Noida and ICMR-National Institute of Malaria Research, New Delhi. The  
119 Institutional ethical boards approved the study. Informed consent was obtained prior to  
120 inclusion in the study. All subjects (mean age 39.4 years, range 15 – 70 years) were SARS-  
121 CoV-2 PCR positive at the time of initial diagnosis, and were PCR negative when recruited for  
122 this study at 3.6 – 12 weeks post initial diagnosis (**Table 1**). Samples collected from healthy  
123 adult blood bank donors in the year 2018 are included as pre-pandemic controls.

### 124 ***SARS-CoV-2 specific PCR***

125 SARS-CoV-2 specific rRT-PCR was performed as per the Indian government guidelines for  
126 COVID-19 diagnosis. Nasopharyngeal and throat swabs were collected in viral transport  
127 medium (VTM) (HiMedia, #AL 167)) and transported to the testing laboratory maintaining  
128 cold chain. All the samples were subjected to the first line screening assay or the ‘e’ gene  
129 assay as per the guidelines (30). Samples reactive by the first line assay were subjected to  
130 the RdRp gene assay (Invitrogen SuperScript™ III Platinum® One-Step Quantitative Kit (Cat.  
131 No.11732088)). Samples reactive for both the genes were labeled positive, while samples  
132 reactive to ‘e’ gene only were considered indeterminate and were subjected to repeat  
133 sampling. The same protocol was used to verify that the subjects were PCR negative at the  
134 time of recruitment for this study.

135 **SARS-CoV-2 RBD-specific direct ELISA**

136 Recombinant SARS-CoV-2 RDB gene was cloned, expressed, purified and standard direct  
137 ELISAs were performed as previously described (31). Briefly, purified RBD was coated on  
138 MaxiSorp plates (Thermo Fisher, #439454) at a concentration of 1 ug/mL in 100 uL  
139 phosphate-buffered saline (PBS) at 4°C overnight. The plates were washed extensively with  
140 PBS containing 0.05% Tween-20. Three-fold serially diluted plasma samples were added to  
141 the plates and incubated at room temperature for 1hr. After incubation, the plates were  
142 washed and the SARS-CoV-2 RBD specific IgG, IgM, IgA signals were detected by incubating  
143 with horseradish peroxidase (HRP) conjugated - anti-human IgG (Jackson ImmunoResearch  
144 Labs, #109-036-098), IgM (Jackson ImmunoResearch Labs, #109-036-129), or IgA (Jackson  
145 ImmunoResearch Labs, #109-036-011). Plates were then washed thoroughly and developed  
146 with o-phenylenediamine (OPD) substrate (Sigma, #P8787) in 0.05M phosphate-citrate  
147 buffer (Sigma, #P4809) pH 5.0, containing with 0.012% hydrogen peroxide (Fisher Scientific,  
148 #18755) just before use. Absorbance was measured at 490 nm.

149 **Enumeration of SARS-CoV-2 RBD-specific memory B cells**

150 Purified RBD protein (100 ug) was labeled with Alexa Fluor 488 using microscale protein  
151 labeling kit (Life Technologies, #A30006) as per manufacturer's protocol. PBMC's were  
152 stained with RBD-Alexa Fluor 488 for 1 hour at 4°C, followed by washing with PBS containing  
153 0.25% FBS, and incubation with efluor780 Fixable Viability (Live Dead) dye (Life  
154 Technologies, #65-0865-14) and anti-human CD3, CD19, CD27, CD38 and IgD antibodies (BD  
155 Biosciences) for 30 minutes. Cells were washed twice with FACS buffer and acquired on BD  
156 LSR Fortessa X20. Data was analyzed using FlowJo software 10. SARS-CoV-2 RBD-specific

157 memory B cells were identified in cells positive for CD19, CD20, CD27 that were negative for  
158 IgD and CD3.

159

### 160 ***IgG ELISA for SARS-CoV-2 whole virus preparation***

161 SARS-CoV-2 antigen specific IgG was detected using a commercially available assay (COVID-  
162 Kavach ELISA tests kit, Zydus diagnostics), which measures responses to antigen  
163 concentrated from gamma-irradiated SARS-CoV-2-infected tissue culture fluid as per the  
164 manufacturer's instructions (32, 33).

### 165 ***SARS-CoV-2 neutralization assay***

166 Neutralization titers to SARS-CoV-2 were determined as previously described (31). Briefly  
167 infectious clone of the full-length mNeonGreen SARS-CoV-2 (2019-nCoV/USA\_WA1/2020)  
168 was used to test heat-inactivated COVID-19 convalescent samples and healthy donor  
169 samples (pre-pandemic). Heat-inactivated serum was serially diluted three-fold in duplicate  
170 starting at a 1:20 dilution in a 96-well round-bottom plate and incubated between 750 FFU  
171 of ic-SARS-CoV-2-mNG for 1 h at 37°C. This antibody-virus mixture was transferred into the  
172 wells of a 96-well plate that had been seeded with Vero-E6 cells the previous day at a  
173 concentration of  $2.5 \times 10^4$  cells/well. After 1 hour, the antibody-virus inoculum was removed  
174 and 0.85% methylcellulose in 2% FBS containing DMEM was overlaid onto the cell  
175 monolayer. Cells were incubated at 37°C for 24 hours. Cells were washed three times with  
176 1XPBS (Corning Cellgro) and fixed with 125  $\mu$ l of 2% paraformaldehyde in PBS (Electron  
177 Microscopy Sciences) for 30 minutes. Following fixation, plates were washed twice with 1x  
178 PBS and imaged on an ELISPOT reader (CTL Analyzer). Foci were counted using Viridot (34)



179 (counted first under the “green light” setting followed by background subtraction under the  
180 “red light” setting). FRNT-mNG<sub>50</sub> titers were calculated by non-linear regression analysis  
181 using the 4PL sigmoidal dose curve equation on Prism 8 (Graphpad Software).  
182 Neutralization titers were calculated as 100% x [1- (average foci in duplicate wells incubated  
183 with the specimen) ÷ (average number of foci in the duplicate wells incubated at the highest  
184 dilution of the respective specimen)].

### 185 ***Statistical analysis***

186 Statistical analysis was performed using GraphPad prism 8.0 software. Non-parametric t test  
187 (Mann-Whitney) was used to calculate the differences between groups. Non-parametric  
188 Spearman’s correlation coefficient (r) was used to calculate correlation between groups.  
189 A *p* value of  $\leq 0.05$  was considered as significant.

190

191 **Results**

192

193 ***SARS-CoV-2 RBD-specific humoral immunity in COVID-19 recovered individuals.***

194 The demographic profile of COVID-19 recovered individuals recruited for this study is shown  
195 in **Table 1**. All subjects were at least 3.6 weeks past their initial SARS-CoV-2 positive  
196 diagnosis. RBD-specific ELISA curves for IgG, IgA and IgM at different dilutions of plasma in  
197 pre-pandemic healthy versus COVID-19 recovered individuals are shown in **Figure 1**. RBD-  
198 specific responses were highly elevated in COVID-19 recovered individuals as compared to  
199 pre-pandemic healthy controls (**Figure 1A,B,C, left versus middle panels**). Titers of IgG,  
200 IgA and IgM in the COVID-19 recovered individuals showed substantial inter-individual  
201 variation (**Figure 1 A, B, C, right panel**) - with IgG endpoint titers ranging from below  
202 detection to 24484 ( $2000\pm 619$ ); IgA titers from below detection to 5686 ( $386\pm 136$ ) and IgM  
203 titers from below detection to 2958 ( $515\pm 90$ ). Four individuals had undetectable RBD-  
204 specific IgG and IgA titers. One of these individuals was also below detection for IgM (**Table**  
205 **2**). Inter-individual heterogeneity was not related to the age of the individuals (**Figure 2A**)  
206 or the number of days that elapsed between PCR confirmation of infection and sample  
207 collection (**Figure 2B**).

208

209 ***SARS-CoV-2 specific neutralizing titers in COVID-19 recovered individuals.***

210 To assess plasma neutralizing titers from COVID-19 convalescent individuals, we performed  
211 a live virus neutralization assay using a focus-reduction neutralization mNeonGreen (FRNT-  
212 mNG) assay (31). The neutralizing activity at different dilutions of plasma for pre-pandemic

213 healthy individuals (**Figure 3A**) and COVID-19 recovered individuals is shown in (**Figure**  
214 **3B**). **Figure 3C** shows FRNT-mNG<sub>50</sub> titers calculated based on the plasma dilution that  
215 neutralized 50% of the virus. While all pre-pandemic healthy individuals had undetectable  
216 FRNT-mNG<sub>50</sub> titers, only half of the COVID-19 recovered individuals showed 50% or more  
217 neutralization even at a 1:20 dilution of plasma. Similar to RBD-specific IgG titers, the FRNT-  
218 mNG<sub>50</sub> titers were heterogeneous with the latter reaching titers as high as 682 (**Figure 3C**).  
219  
220 Previous studies in other viral infections have shown that all three antibody isotypes (IgG,  
221 IgA and IgM) can potentially neutralize (35-39). We next determined if any correlation exists  
222 between SARS-CoV-2 neutralizing titers and RBD-specific IgG, IgA, IgM binding antibody  
223 titers. We observed a positive correlation ( $r=0.83$ ;  $p<0.001$ ) between SARS-CoV-2  
224 neutralizing titers and RBD-specific IgG titers (**Figure 4, left graph**) but not with IgA  
225 (**Figure 4, middle graph**) or IgM titers (**Figure 4, right graph**).  
226  
227 Plasma infusion therapy has recently been started in India as an intervention therapy for  
228 COVID-19. For this, plasma donors are being typically identified by the presence of IgG to  
229 SARS-CoV-2 by commercial ELISA tests (40). One of these tests detects IgG towards viral  
230 antigens concentrated from gamma-irradiated SARS-CoV-2-infected tissue culture fluid (32,  
231 33). It was therefore of interest to examine the correlation between neutralization titers and  
232 IgG responses measured using this test. We observed that, of the 42 COVID-19 recovered  
233 individuals tested, 33 were IgG positive whereas 9 were below the assay cut off (**Figure 5A**).  
234 Of the 9 individuals that were below cut off, 4 also tested negative by the RBD-specific IgG  
235 ELISA (**Table 2**). All of the samples from the pre-pandemic healthy individuals were below

236 the limit of detection using both the ELISA methods. Most importantly, the IgG values  
237 obtained by whole virus-based ELISA did not show as robust a correlation ( $r=0.56$ ) with  
238 neutralizing antibody titers (**Figure 5B**) as compared to those observed with RBD-specific  
239 IgG titers ( $r=0.83$ ) (**Figure 4, left graph**).

240

241 ***Characterization of RBD-specific memory B cells in COVID-19 recovered individuals.***

242 While circulating neutralizing antibodies help prevent re-infection by viruses, memory B  
243 cells allow for rapid production of new antibodies in case of re-infection. To address whether  
244 the COVID-19 recovered individuals generated memory B cells, we enumerated RBD-specific  
245 memory B cells using fluorescently-conjugated RBD antigen. An example of the flow  
246 cytometric gating strategy and RBD staining among the gated memory B cells is shown in  
247 **Figure 6A and 6B**. **Figure 6C** shows the frequency of RBD-specific memory B cells in a  
248 subset of the individuals where sufficient PBMCs were available. Though we found that there  
249 was substantial inter-individual variation in the frequency of SARS-CoV-2 RBD-specific  
250 memory B cells, their frequencies modestly correlated with RBD-specific IgG titers.

251 **Discussion**

252

253 Our study provides a detailed understanding of humoral immunity and memory B cells in  
254 COVID-19 recovered individuals from India. We examined SARS-CoV-2 neutralizing  
255 antibodies, IgG, IgM, IgA and memory B cells in pre-pandemic healthy versus COVID-19  
256 recovered individuals and further evaluated inter-individual variation and relation among  
257 these.

258

259 Our correlative analysis of RBD-specific IgG binding titers with neutralizing antibody titers  
260 and memory B cells has important implications for not only identifying potential donors for  
261 plasma therapy but also for understanding humoral and cellular memory post COVID-19.  
262 Though current plasma therapy guidelines in India do not consider neutralizing antibody  
263 titers, United States Food and Drug Administration (FDA) guidelines recommend, when  
264 available, a neutralizing titer of 1:160 or 1:80 to be used for identifying potential plasma  
265 donors (41). Our correlation analysis shows that RBD-specific titers of more than 3668 can  
266 provide a suitable surrogate for identifying the individuals with neutralizing titers of above  
267 1:160 and RBD-specific IgG titers 1926 for neutralizing titers of 1:80. Though larger scale  
268 studies are needed to establish robustness, these observations have timely implications to  
269 identify potential plasma therapy donors.

270

271 Our study raises important questions on formation of protective immune memory after  
272 recovering from COVID-19. We found that nearly half of the COVID-19 recovered individuals  
273 did not induce 50% neutralizing titers even at 1:20 dilution of plasma. This raises the

274 question of whether these individuals with low neutralizing antibodies also differ in  
275 formation of cellular immune memory. Our data show that individuals with low neutralizing  
276 antibodies indeed had lower memory B cells. Given that T cells may also contribute to COVID-  
277 19 protection, studies are needed to understand whether these individuals may also differ  
278 in the generation of memory CD8 and CD4 T cells (42-44).

279

280 The reason why only half of the COVID-19 recovered individuals developed appreciable  
281 levels of neutralizing antibody titers requires further investigation. This may be related to  
282 inter-individual differences in human immune responses associated with the expected  
283 heterogeneity in initial viral inoculum(45), initial viral loads (46-48), incubation period (49),  
284 host genetic factors (50-52) and disease severity (53, 54). This is consistent with previous  
285 studies that show relatively higher neutralizing antibodies in COVID-19 hospitalized patients  
286 during the acute febrile phase, or in recovered individuals that were previously hospitalized  
287 with severe COVID-19 disease (53, 54). It is noteworthy that the COVID-19 recovered  
288 individuals from our study had mild to moderate symptoms during the initial diagnosis. In  
289 light of these studies, our findings warrant future studies to seek an understanding of  
290 whether the individuals that have generated low or no neutralizing antibodies, IgG titers or  
291 memory B cells past recovery will be protected if they were re-exposed to SARS-CoV-2 or a  
292 related virus.

## 293 **Acknowledgements**

294 This research was supported in part by Indian Council of Medical Research VIR/COVID-  
295 19/02/2020/ECD-1 (A.C, K.M). K.N, E.S.R. are supported through Dengue Translational Research  
296 Consortia BIRAC/NBM-PMU/EST-TRC\_ICGEB/2018 (A.C.); K.G. is supported through DBT grant  
297 BT/PR30260/MED/15/194/2018 (A.C, K.M); S.K. is supported through DBT/Wellcome Trust India  
298 Alliance Early Career Fellowship grant IA/E/18/1/504307. We are thankful to Mr. Satendra Singh  
299 and Mr. Ajay Singh, ICGEB, New Delhi for technical support; Director, SSPH & PGTI, Noida and  
300 Director, SHKM Government Medical College, Nuh, Haryana for facilitating the study. Vineet  
301 Menachery and Pei-Yong Shi for providing the icSARS-CoV-2mNG for the neutralization assays.

302

## 303 **Author Contributions**

304 Experimental work, data acquisition and analysis of data by K.N, K.G, S.K, E.S.R, V.V.E., K.F,  
305 R.K, S.L. C.D, J.W, M.S.S, and D.S. Clinical site coordination by D.S, P.K.G, S.A, A.S and M.R.  
306 Conceptualization and implementation by A.S, R.A, K.M, A.C. Manuscript writing by A.C and  
307 K.M. All authors contributed reviewing and editing the manuscript.

308

## 309 **Figure legends**

310

311 ***Figure 1: Evaluation of SARS-CoV-2 RBD specific IgG, IgA and IgM antibody responses.***

312 **(A)** RBD-specific IgG, **(B)**, RBD-specific IgA; **(C)**, RBD-specific IgM. Left, pre-pandemic  
313 healthy (n=22), middle COVID-19 recovered (n=42); right, endpoint titers. ELISA cutoff  
314 values are calculated using the average plus 3 standard deviations of the 22 healthy controls  
315 at 1:100 dilution (shown as a dotted line). The unpaired analysis was done using non-

316 parametric Mann-Whitney-U test.  $p \leq 0.05$  was considered significant. Assay cutoff value is  
317 marked with dotted line.

318 **Figure 2. Correlation of age and day post initial diagnosis of COVID-19 recovered**  
319 **individuals with SARS-CoV-2 IgG, IgM and IgA titers.**

320 **(A).** Age versus IgG (left, n=42), IgA (middle, n=42) or IgM (right, n=42) titers. **(B).** Time post  
321 initial diagnosis versus IgG (left, n=42), IgA (middle, n=42) or IgM (right, n=42) titers.  
322 Correlations were calculated by Spearman's correlation coefficient  $r$ .  $p \leq 0.05$  is considered  
323 significant. Note that none of the data sets above reached significant values of correlation.

324

325 **Figure 3. Evaluation of SARS-CoV-2 neutralizing antibodies in COVID-19 recovered**  
326 **individuals.**

327 SARS-CoV-2 neutralizing activity at indicated dilutions of plasma is shown in pre-pandemic  
328 healthy (n=22, in grey) **(A)** and in COVID-19 recovered individuals (n=42, in blue) **(B)**.  
329 Dotted line represents the plasma dilution that leads to 50% neutralization. **(C)** Scatter plot  
330 shows neutralization titers (FRNT-mNG<sub>50</sub>) in pre-pandemic healthy (n=22) and COVID-19  
331 recovered (n=42) individuals. The unpaired analysis was done using non-parametric Mann-  
332 Whitney-U test.  $p \leq 0.05$  was considered significant. Limit of detection is marked with a  
333 dotted line.

334



335 **Figure 4. Correlation analysis of SARS-CoV-2-specific antibody responses versus**  
336 **neutralization titers.**

337 Correlation analysis shows FRNT-mNG<sub>50</sub> titers (x-axis) versus RBD-specific IgG (Left), IgA  
338 (middle) and IgM (right) titers on y-axis in COVID-19 recovered individuals (n=42, blue  
339 dots). Correlation analysis was performed by log transformation of the endpoint ELISA titers  
340 followed by linear regression analysis. Correlations were calculated by Spearman's  
341 correlation coefficient  $r$ .  $p \leq 0.05$  was considered significant. Dotted line on x-axis and y-axis  
342 indicate limit of detection.

343

344 **Figure 5. Correlation analysis of SARS-CoV-2 whole virus specific IgG versus neutralizing**  
345 **titers.**

346 **(A).** Scatter plots shows SARS-CoV-2 whole virus specific IgG measured using measured  
347 using commercial kit (Zydus diagnosis, Covid Kavach) in pre-pandemic healthy (n=5) and  
348 COVID-19 recovered (n=42). The unpaired analysis was done using non-parametric Mann-  
349 Whitney-U test.  $p \leq 0.05$  was considered significant. **(B).** Correlation analysis of SARS-CoV-2  
350 whole virus antigen specific IgG ELISA kit values (y-axis) versus neutralizing titers (x-axis)  
351 in COVID-19 recovered individuals (n=42). Correlations were calculated by Spearman's  
352 correlation coefficient  $r$ .  $p \leq 0.05$  was considered significant. Dotted line on x-axis indicate  
353 limit of detection and on y-axis assay cut off.

354

355 **Figure 6. SARS-CoV-2 RBD-specific memory B cell analysis in COVID-19 recovered**  
356 **individuals.**

357 **(A)** Gating strategy used to identify memory B cells. **(B)** SARS-CoV-2 RBD-specific memory  
358 B cells on gated total memory B cells that were CD19 positive, CD20 high, IgD negative and  
359 CD27 high is shown. **(C)** Frequency of RBD-specific memory B cells of the total memory B  
360 cells in the COVID-19 recovered individuals (n= 13). **(D)** Correlation analysis shows  
361 frequency of RBD-specific memory B cells (x-axis) and the RBD-specific IgG titers (y-axis) in  
362 COVID-19 recovered individuals.

363

364

365

366

367

368

369

370

371

372

373

374

375

376

377 **References:**

378

- 379 1. WHO. 2020. Timeline: WHO's COVID-19 response.
- 380 2. Ministry of Health and Family Welfare GoI. 2020. COVID-19 INDIA as on: 26 August  
381 2020.
- 382 3. Al-Kassmy J, Pedersen J, Kobinger G. 2020. Vaccine Candidates against Coronavirus  
383 Infections. Where Does COVID-19 Stand? *Viruses* 12.
- 384 4. Amanat F, Krammer F. 2020. SARS-CoV-2 Vaccines: Status Report. *Immunity* 52:583-  
385 589.
- 386 5. Dagotto G, Yu J, Barouch DH. 2020. Approaches and Challenges in SARS-CoV-2 Vaccine  
387 Development. *Cell Host Microbe* doi:10.1016/j.chom.2020.08.002.
- 388 6. Hashemian SM, Farhadi T, Velayati AA. 2020. A Review on Remdesivir: A Possible  
389 Promising Agent for the Treatment of COVID-19. *Drug Des Devel Ther* 14:3215-3222.
- 390 7. Li Q, Kang C. 2020. Progress in Developing Inhibitors of SARS-CoV-2 3C-Like Protease.  
391 *Microorganisms* 8.
- 392 8. Malik S, Gupta A, Zhong X, Rasmussen TP, Manautou JE, Bahal R. 2020. Emerging  
393 Therapeutic Modalities against COVID-19. *Pharmaceuticals (Basel)* 13.
- 394 9. Nabil A, Uto K, Elshemy MM, Soliman R, Hassan AA, Ebara M, Shiha G. 2020. Current  
395 coronavirus (SARS-CoV-2) epidemiological, diagnostic and therapeutic approaches:  
396 An updated review until June 2020. *EXCLI J* 19:992-1016.
- 397 10. Parvathaneni V, Gupta V. 2020. Utilizing drug repurposing against COVID-19 - Efficacy,  
398 limitations, and challenges. *Life Sci* doi:10.1016/j.lfs.2020.118275:118275.
- 399 11. Verma HK, Merchant N, Verma MK, Kuru CI, Singh AN, Ulucan F, Verma P,  
400 Bhattacharya A, Bhaskar L. 2020. Current updates on the European and WHO  
401 registered clinical trials of coronavirus disease 2019 (COVID-19). *Biomed J*  
402 doi:10.1016/j.bj.2020.07.008.
- 403 12. Bloch EM. 2020. Convalescent plasma to treat COVID-19. *Blood* 136:654-655.
- 404 13. Dhanasekaran S, Vajravelu LK, Venkatesalu V. 2020. Risk-benefit analysis on the  
405 clinical significance of convalescent plasma therapy in the management of COVID-19.  
406 *Postgrad Med J* doi:10.1136/postgradmedj-2020-138056.
- 407 14. Duan K, Liu B, Li C, Zhang H, Yu T, Qu J, Zhou M, Chen L, Meng S, Hu Y, Peng C, Yuan M,  
408 Huang J, Wang Z, Yu J, Gao X, Wang D, Yu X, Li L, Zhang J, Wu X, Li B, Xu Y, Chen W,  
409 Peng Y, Hu Y, Lin L, Liu X, Huang S, Zhou Z, Zhang L, Wang Y, Zhang Z, Deng K, Xia Z,  
410 Gong Q, Zhang W, Zheng X, Liu Y, Yang H, Zhou D, Yu D, Hou J, Shi Z, Chen S, Chen Z,  
411 Zhang X, Yang X. 2020. Effectiveness of convalescent plasma therapy in severe COVID-  
412 19 patients. *Proc Natl Acad Sci U S A* 117:9490-9496.
- 413 15. Focosi D, Anderson AO, Tang JW, Tuccori M. 2020. Convalescent Plasma Therapy for  
414 COVID-19: State of the Art. *Clin Microbiol Rev* 33.
- 415 16. Rabelo-da-Ponte FD, Silvello D, Scherer JN, Ayala AR, Klamt F. 2020. Convalescent  
416 Plasma Therapy on Patients with Severe or Life-Threatening COVID-19: A Metadata  
417 Analysis. *J Infect Dis* doi:10.1093/infdis/jiaa509.
- 418 17. Salazar E, Christensen PA, Graviss EA, Nguyen DT, Castillo B, Chen J, Lopez BV, Eagar  
419 TN, Yi X, Zhao P, Rogers J, Shehabeldin A, Joseph D, Leveque C, Olsen RJ, Bernard DW,  
420 Gollihar J, Musser JM. 2020. Treatment of COVID-19 Patients with Convalescent

- 421 Plasma Reveals a Signal of Significantly Decreased Mortality. *Am J Pathol*  
422 doi:10.1016/j.ajpath.2020.08.001.
- 423 18. Shen C, Wang Z, Zhao F, Yang Y, Li J, Yuan J, Wang F, Li D, Yang M, Xing L, Wei J, Xiao  
424 H, Yang Y, Qu J, Qing L, Chen L, Xu Z, Peng L, Li Y, Zheng H, Chen F, Huang K, Jiang Y,  
425 Liu D, Zhang Z, Liu Y, Liu L. 2020. Treatment of 5 Critically Ill Patients With COVID-19  
426 With Convalescent Plasma. *JAMA* doi:10.1001/jama.2020.4783.
- 427 19. Ye M, Fu D, Ren Y, Wang F, Wang D, Zhang F, Xia X, Lv T. 2020. Treatment with  
428 convalescent plasma for COVID-19 patients in Wuhan, China. *J Med Virol*  
429 doi:10.1002/jmv.25882.
- 430 20. Zhang B, Liu S, Tan T, Huang W, Dong Y, Chen L, Chen Q, Zhang L, Zhong Q, Zhang X,  
431 Zou Y, Zhang S. 2020. Treatment With Convalescent Plasma for Critically Ill Patients  
432 With Severe Acute Respiratory Syndrome Coronavirus 2 Infection. *Chest* 158:e9-e13.
- 433 21. Barnes CO, West AP, Jr., Huey-Tubman KE, Hoffmann MAG, Sharaf NG, Hoffman PR,  
434 Koranda N, Gristick HB, Gaebler C, Muecksch F, Lorenzi JCC, Finkin S, Hagglof T,  
435 Hurley A, Millard KG, Weisblum Y, Schmidt F, Hatziioannou T, Bieniasz PD, Caskey M,  
436 Robbiani DF, Nussenzweig MC, Bjorkman PJ. 2020. Structures of Human Antibodies  
437 Bound to SARS-CoV-2 Spike Reveal Common Epitopes and Recurrent Features of  
438 Antibodies. *Cell* 182:828-842 e16.
- 439 22. Cao WC, Liu W, Zhang PH, Zhang F, Richardus JH. 2007. Disappearance of antibodies  
440 to SARS-associated coronavirus after recovery. *N Engl J Med* 357:1162-3.
- 441 23. Lan J, Ge J, Yu J, Shan S, Zhou H, Fan S, Zhang Q, Shi X, Wang Q, Zhang L, Wang X. 2020.  
442 Structure of the SARS-CoV-2 spike receptor-binding domain bound to the ACE2  
443 receptor. *Nature* 581:215-220.
- 444 24. Liu L, Wang P, Nair MS, Yu J, Rapp M, Wang Q, Luo Y, Chan JF, Sahi V, Figueroa A, Guo  
445 XV, Cerutti G, Bimela J, Gorman J, Zhou T, Chen Z, Yuen KY, Kwong PD, Sodroski JG, Yin  
446 MT, Sheng Z, Huang Y, Shapiro L, Ho DD. 2020. Potent neutralizing antibodies against  
447 multiple epitopes on SARS-CoV-2 spike. *Nature* 584:450-456.
- 448 25. Mittal A, Manjunath K, Ranjan RK, Kaushik S, Kumar S, Verma V. 2020. COVID-19  
449 pandemic: Insights into structure, function, and hACE2 receptor recognition by SARS-  
450 CoV-2. *PLoS Pathog* 16:e1008762.
- 451 26. Peterhoff D, Gluck V, Vogel M, Schuster P, Schutz A, Neubert P, Albert V, Frisch S,  
452 Kiessling M, Pervan P, Werner M, Ritter N, Babl L, Deichner M, Hanses F, Lubnow M,  
453 Muller T, Lunz D, Hitzenbichler F, Audebert F, Hahnel V, Offner R, Muller M, Schmid S,  
454 Burkhardt R, Gluck T, Koller M, Niller HH, Graf B, Salzberger B, Wenzel JJ, Jantsch J,  
455 Gessner A, Schmidt B, Wagner R. 2020. A highly specific and sensitive serological  
456 assay detects SARS-CoV-2 antibody levels in COVID-19 patients that correlate with  
457 neutralization. *Infection* doi:10.1007/s15010-020-01503-7.
- 458 27. Wang Q, Zhang Y, Wu L, Niu S, Song C, Zhang Z, Lu G, Qiao C, Hu Y, Yuen KY, Wang Q,  
459 Zhou H, Yan J, Qi J. 2020. Structural and Functional Basis of SARS-CoV-2 Entry by  
460 Using Human ACE2. *Cell* 181:894-904 e9.
- 461 28. Zost SJ, Gilchuk P, Case JB, Binshtein E, Chen RE, Reidy JX, Trivette A, Nargi RS, Sutton  
462 RE, Suryadevara N, Williamson LE, Chen EC, Jones T, Day S, Myers L, Hassan AO, Kafai  
463 NM, Winkler ES, Fox JM, Steinhardt JJ, Ren K, Loo YM, Kallewaard NL, Martinez DR,  
464 Schafer A, Gralinski LE, Baric RS, Thackray LB, Diamond MS, Carnahan RH, Crowe JE.  
465 2020. Potently neutralizing human antibodies that block SARS-CoV-2 receptor  
466 binding and protect animals. bioRxiv doi:10.1101/2020.05.22.111005.

- 467 29. Zost SJ, Gilchuk P, Chen RE, Case JB, Reidy JX, Trivette A, Nargi RS, Sutton RE,  
468 Suryadevara N, Chen EC, Binshtein E, Shrihari S, Ostrowski M, Chu HY, Didier JE,  
469 MacRenaris KW, Jones T, Day S, Myers L, Eun-Hyung Lee F, Nguyen DC, Sanz I,  
470 Martinez DR, Rothlauf PW, Bloyet LM, Whelan SPJ, Baric RS, Thackray LB, Diamond  
471 MS, Carnahan RH, Crowe JE, Jr. 2020. Rapid isolation and profiling of a diverse panel  
472 of human monoclonal antibodies targeting the SARS-CoV-2 spike protein. *Nat Med*  
473 doi:10.1038/s41591-020-0998-x.
- 474 30. ICMR-NIV. 2020. Standard Operating Procedure For Detection of 2019 novel  
475 coronavirus (2019-nCoV) in suspected human cases by rRT-PCR : confirmation assay.
- 476 31. Suthar MS, Zimmerman M, Kauffman R, Mantus G, Linderman S, Vanderheiden A,  
477 Nyhoff L, Davis C, Adekunle S, Affer M, Sherman M, Reynolds S, Verkerke H, Alter DN,  
478 Guarner J, Bryksin J, Horwath M, Arthur C, Saakadze N, Smith GH, Edupuganti S,  
479 Scherer EM, Hellmeister K, Cheng A, Morales JA, Neish AS, Stowell SR, Frank F, Ortlund  
480 E, Anderson E, Menachery V, Rouphael N, Metha A, Stephens DS, Ahmed R, Roback J,  
481 Wrammert J. 2020. Rapid generation of neutralizing antibody responses in COVID-19  
482 patients. medRxiv doi:10.1101/2020.05.03.20084442.
- 483 32. Chaudhuri S TR, Kshetrapal P, Batra G, Shrivastava T, Desiraju KB, Kang G, Bhatnagar  
484 S. 2020. Comparative Evaluation of SARS-CoV-2 IgG Assays in India. medRxiv preprint  
485 doi:<https://doi.org/10.1101/2020.08.12.20173856>.
- 486 33. Sapkal G, Shete-Aich A, Jain R, Yadav PD, Sarkale P, Lakra R, Baradkar S, Deshpande  
487 GR, Mali D, Tilekar BN, Majumdar T, Kaushal H, Gurav Y, Gupta N, Mohandas S,  
488 Deshpande K, Kaduskar O, Salve M, Patil S, Gaikwad S, Sugunan AP, Ashok M, Giri S,  
489 Shastri J, Abraham P, Gangakhedkar RR, Covid Support Team: Pawar S  
490 PSSVNVMBJASPMRKRSDK. 2020. Development of indigenous IgG ELISA for the  
491 detection of anti-SARS-CoV-2 IgG. *Indian J Med Res* 151:444-449.
- 492 34. Katzelnick LC, Coello Escoto A, McElvany BD, Chavez C, Salje H, Luo W, Rodriguez-  
493 Barraquer I, Jarman R, Durbin AP, Diehl SA, Smith DJ, Whitehead SS, Cummings DAT.  
494 2018. Viridot: An automated virus plaque (immunofocus) counter for the  
495 measurement of serological neutralizing responses with application to dengue virus.  
496 *PLoS Negl Trop Dis* 12:e0006862.
- 497 35. Chua CL, Sam IC, Chiam CW, Chan YF. 2017. The neutralizing role of IgM during early  
498 Chikungunya virus infection. *PLoS One* 12:e0171989.
- 499 36. Ejemel M, Li Q, Hou S, Schiller ZA, Tree JA, Wallace A, Amcheslavsky A, Kurt Yilmaz N,  
500 Buttigieg KR, Elmore MJ, Godwin K, Coombes N, Toomey JR, Schneider R, Ramchetty  
501 AS, Close BJ, Chen DY, Conway HL, Saeed M, Ganesa C, Carroll MW, Cavacini LA,  
502 Klempner MS, Schiffer CA, Wang Y. 2020. A cross-reactive human IgA monoclonal  
503 antibody blocks SARS-CoV-2 spike-ACE2 interaction. *Nat Commun* 11:4198.
- 504 37. Lizeng Q, Nilsson C, Sourial S, Andersson S, Larsen O, Aaby P, Ehnlund M, Bjorling E.  
505 2004. Potent neutralizing serum immunoglobulin A (IgA) in human  
506 immunodeficiency virus type 2-exposed IgG-seronegative individuals. *J Virol*  
507 78:7016-22.
- 508 38. Skountzou I, Satyabhama L, Stavropoulou A, Ashraf Z, Esser ES, Vassilieva E,  
509 Koutsonanos D, Compans R, Jacob J. 2014. Influenza virus-specific neutralizing IgM  
510 antibodies persist for a lifetime. *Clin Vaccine Immunol* 21:1481-9.
- 511 39. Sterlin D MA, Miyara M, Mohr A, Anna F, Claer L, Quentric P, Fadlallah J, Ghillani P,  
512 Gunn C, Hockett R, Mudumba S, Guihot A, Luyt CE, Mayaux J, Beurton A, Fourati S,



- 513 Lacorte JM, Yssel H, Parizot C, Dorgham K, Charneau P, Amoura Z, Gorochov G. 2020.  
514 IgA dominates the early neutralizing antibody response to SARS-CoV-2. medRxiv  
515 doi:<https://doi.org/10.1101/2020.06.10.20126532>.
- 516 40. cdsco.gov.in. 2020. A Phase II, Open Label, Randomized Controlled Trial to Assess the  
517 Safety and Efficacy of Convalescent Plasma to Limit COVID-19 Associated  
518 Complications in Moderate Disease.
- 519 41. FDA. 2020. Recommendations for Investigational COVID-19 Convalescent Plasma.
- 520 42. Chen Z, John Wherry E. 2020. T cell responses in patients with COVID-19. *Nat Rev*  
521 *Immunol* 20:529-536.
- 522 43. Grifoni A, Weiskopf D, Ramirez SI, Mateus J, Dan JM, Moderbacher CR, Rawlings SA,  
523 Sutherland A, Premkumar L, Jadi RS, Marrama D, de Silva AM, Frazier A, Carlin AF,  
524 Greenbaum JA, Peters B, Krammer F, Smith DM, Crotty S, Sette A. 2020. Targets of T  
525 Cell Responses to SARS-CoV-2 Coronavirus in Humans with COVID-19 Disease and  
526 Unexposed Individuals. *Cell* 181:1489-1501 e15.
- 527 44. Jesenak M, Brndiarova M, Urbancikova I, Rennerova Z, Vojtkova J, Bobcakova A, Ostro  
528 R, Banovcin P. 2020. Immune Parameters and COVID-19 Infection - Associations With  
529 Clinical Severity and Disease Prognosis. *Front Cell Infect Microbiol* 10:364.
- 530 45. Welten SPM, Redeker A, Toes REM, Arens R. 2016. Viral Persistence Induces Antibody  
531 Inflation without Altering Antibody Avidity. *J Virol* 90:4402-4411.
- 532 46. Akondy RS, Johnson PL, Nakaya HI, Edupuganti S, Mulligan MJ, Lawson B, Miller JD,  
533 Pulendran B, Antia R, Ahmed R. 2015. Initial viral load determines the magnitude of  
534 the human CD8 T cell response to yellow fever vaccination. *Proc Natl Acad Sci U S A*  
535 112:3050-5.
- 536 47. Arankalle VA, Lole KS, Arya RP, Tripathy AS, Ramdasi AY, Chadha MS, Sangle SA,  
537 Kadam DB. 2010. Role of host immune response and viral load in the differential  
538 outcome of pandemic H1N1 (2009) influenza virus infection in Indian patients. *PLoS*  
539 *One* 5.
- 540 48. Reddy V, Mani RS, Desai A, Ravi V. 2014. Correlation of plasma viral loads and  
541 presence of Chikungunya IgM antibodies with cytokine/chemokine levels during  
542 acute Chikungunya virus infection. *J Med Virol* 86:1393-401.
- 543 49. Hermesh T, Moltedo B, Lopez CB, Moran TM. 2010. Buying time-the immune system  
544 determinants of the incubation period to respiratory viruses. *Viruses* 2:2541-58.
- 545 50. Carter-Timofté ME, Jorgensen SE, Freytag MR, Thomsen MM, Brinck Andersen NS, Al-  
546 Mousawi A, Hait AS, Mogensen TH. 2020. Deciphering the Role of Host Genetics in  
547 Susceptibility to Severe COVID-19. *Front Immunol* 11:1606.
- 548 51. Hou Y, Zhao J, Martin W, Kallianpur A, Chung MK, Jehi L, Sharifi N, Erzurum S, Eng C,  
549 Cheng F. 2020. New insights into genetic susceptibility of COVID-19: an ACE2 and  
550 TMPRSS2 polymorphism analysis. *BMC Med* 18:216.
- 551 52. LoPresti M, Beck DB, Duggal P, Cummings DAT, Solomon BD. 2020. The Role of Host  
552 Genetic Factors in Coronavirus Susceptibility: Review of Animal and Systematic  
553 Review of Human Literature. *Am J Hum Genet* doi:10.1016/j.ajhg.2020.08.007.
- 554 53. Kong WH, Zhao R, Zhou JB, Wang F, Kong DG, Sun JB, Ruan QF, Liu MQ. 2020. Serologic  
555 Response to SARS-CoV-2 in COVID-19 Patients with Different Severity. *Virol Sin*  
556 doi:10.1007/s12250-020-00270-x.
- 557 54. Liu ZL, Liu Y, Wan LG, Xiang TX, Le AP, Liu P, Peiris M, Poon LLM, Zhang W. 2020.  
558 Antibody Profiles in Mild and Severe Cases of COVID-19. *Clin Chem* 66:1102-1104.

---

**Table 1. COVID-19 recovered individuals characteristics (n=42)\***

---

|                                      |              |
|--------------------------------------|--------------|
| Age in years Mean (Range)            | 39.4 (15-70) |
| Males/Females                        | 38/4         |
| Days post PCR diagnosis Mean (Range) | 47.3 (25-84) |

---

\*COVID-19 recovered individuals were recruited at Shaheed Hasan Khan Mewati Government Medical College, Nuh, Haryana, India. Super Speciality Paediatric Hospital and Post Graduate Teaching Institute, Noida and ICMR-National Institute of Malaria Research, New Delhi. All subjects were SARS-CoV-2 PCR positive at the time of initial diagnosis and were PCR negative when recruited for this study at 4.8 - 11 weeks post initial diagnosis.

**Table 2. Individual characteristics of the COVID-19 recovered subjects**

| Subject number | Age | Gender (Male,M Female,F) | Days Post PCR Diagnosis | SARS CoV-2 RBD specific Immunoglobulin titers* |      |      | SARS Cov-2 whole Virus specific IgG ELISA values** | Neutralization titer (FRNT-mNG <sub>50</sub> )*** |
|----------------|-----|--------------------------|-------------------------|------------------------------------------------|------|------|----------------------------------------------------|---------------------------------------------------|
|                |     |                          |                         | IgG                                            | IgM  | IgA  |                                                    |                                                   |
| 1              | 23  | M                        | 84                      | 2220                                           | 565  | 220  | 26                                                 | 39                                                |
| 2              | 22  | F                        | 84                      | 354                                            | 283  | <100 | 3                                                  | 26                                                |
| 3              | 68  | M                        | 40                      | 464                                            | <100 | <100 | 19                                                 | <20                                               |
| 4              | 35  | M                        | 51                      | 4547                                           | 393  | 545  | 6                                                  | 113                                               |
| 5              | 50  | M                        | 37                      | 1354                                           | 301  | 275  | 7                                                  | 81                                                |
| 6              | 29  | M                        | 34                      | <100                                           | 866  | <100 | <1.5                                               | <20                                               |
| 7              | 27  | M                        | 34                      | 422                                            | 104  | 450  | <1.5                                               | <20                                               |
| 8              | 25  | M                        | 34                      | 222                                            | 1031 | <100 | 26                                                 | <20                                               |
| 9              | 21  | M                        | 40                      | 650                                            | 588  | 153  | 9                                                  | 25                                                |
| 10             | 39  | M                        | 38                      | 612                                            | 539  | 5686 | 12                                                 | 23                                                |
| 11             | 46  | M                        | 38                      | 2011                                           | 325  | 224  | 24                                                 | 55                                                |
| 12             | 31  | M                        | 38                      | 494                                            | 828  | 183  | 10                                                 | <20                                               |
| 13             | 20  | M                        | 41                      | 944                                            | 274  | <100 | 14                                                 | 49                                                |
| 14             | 36  | M                        | 41                      | 228                                            | 279  | 1614 | <1.5                                               | <20                                               |
| 15             | 34  | M                        | 44                      | 282                                            | 302  | <100 | 4                                                  | <20                                               |
| 16             | 70  | M                        | 44                      | 1250                                           | 220  | 518  | 14                                                 | 43                                                |
| 17             | 40  | M                        | 45                      | 464                                            | 112  | 101  | 16                                                 | <20                                               |
| 18             | 32  | M                        | 41                      | 867                                            | 381  | 399  | <1.5                                               | <20                                               |
| 19             | 57  | M                        | 45                      | 1069                                           | 354  | 231  | <1.5                                               | <20                                               |
| 20             | 27  | F                        | 49                      | 1935                                           | 528  | <100 | 23                                                 | 80                                                |
| 21             | 36  | M                        | 49                      | 3156                                           | 355  | 593  | 28                                                 | 166                                               |
| 22             | 24  | M                        | 45                      | <100                                           | 387  | <100 | <1.5                                               | <20                                               |
| 23             | 55  | F                        | 45                      | <100                                           | 778  | <100 | <1.5                                               | <20                                               |
| 24             | 15  | M                        | 45                      | 212                                            | 496  | <100 | <1.5                                               | <20                                               |
| 25             | 49  | M                        | 45                      | 4183                                           | 2958 | 397  | 17                                                 | 657                                               |
| 26             | 26  | M                        | 48                      | 2352                                           | <100 | <100 | 16                                                 | 48                                                |
| 27             | 54  | F                        | 54                      | 1202                                           | <100 | 182  | 15                                                 | 49                                                |
| 28             | 53  | M                        | 52                      | 799                                            | 197  | 417  | 12                                                 | <20                                               |
| 29             | 52  | M                        | 48                      | 2611                                           | 249  | 157  | 23                                                 | 46                                                |
| 30             | 45  | M                        | 62                      | 1490                                           | 401  | <100 | 15                                                 | 50                                                |
| 31             | 52  | M                        | 56                      | 10127                                          | 421  | 437  | 21                                                 | 434                                               |
| 32             | 26  | M                        | 47                      | <100                                           | <100 | <100 | <1.5                                               | <20                                               |
| 33             | 32  | M                        | 57                      | 701                                            | 177  | <100 | 14                                                 | <20                                               |
| 34             | 44  | M                        | 49                      | 815                                            | 428  | <100 | 20                                                 | <20                                               |
| 35             | 32  | M                        | 40                      | 829                                            | 140  | <100 | 6                                                  | 29                                                |
| 36             | 44  | M                        | 42                      | 4685                                           | 494  | 295  | 26                                                 | 167                                               |
| 37             | 22  | M                        | 77                      | 3954                                           | 764  | 690  | 24                                                 | 209                                               |
| 38             | 49  | M                        | 25                      | 24484                                          | 2828 | 459  | 22                                                 | 682                                               |
| 39             | 55  | M                        | 51                      | 371                                            | 753  | <100 | 17                                                 | <20                                               |
| 40             | 36  | M                        | 51                      | 621                                            | 350  | 104  | 17                                                 | <20                                               |
| 41             | 60  | M                        | 51                      | 156                                            | 459  | <100 | 17                                                 | 34                                                |
| 42             | 62  | M                        | 47                      | 467                                            | 354  | <100 | 6                                                  | <20                                               |

\*ELISA end point titre limit of detection is 100.

\*\*ELISA was performed with a commercial kit (Covid Kavach, Zydus) using 1:100 dilution of plasma as per by the manufacturer's recommendation. Assay cut off is 1.5.

\*\*\*Neutralization titres: Neutralization assay were performed using 3 fold dilution of plasma, starting at 1:20 up to 1:43740. Limit of detection for FRNT-mNG<sub>50</sub> is 20.

560  
561  
562  
563



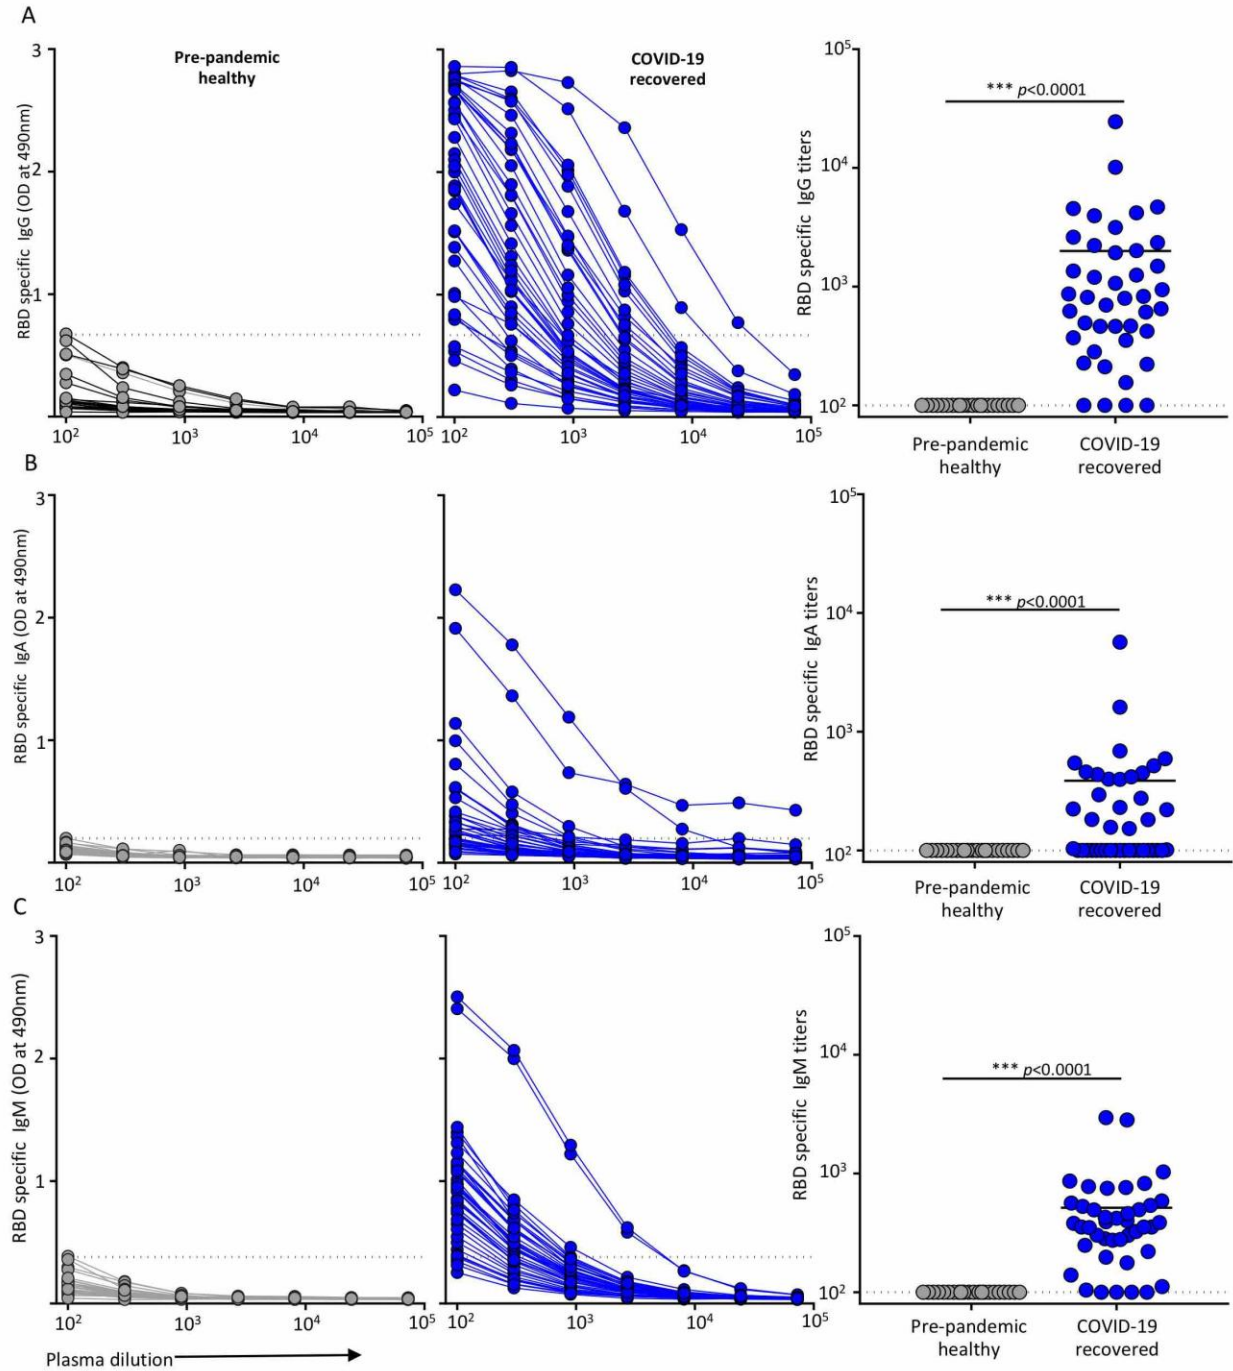

564  
565  
566  
567  
568  
569  
570  
571

Figure 1

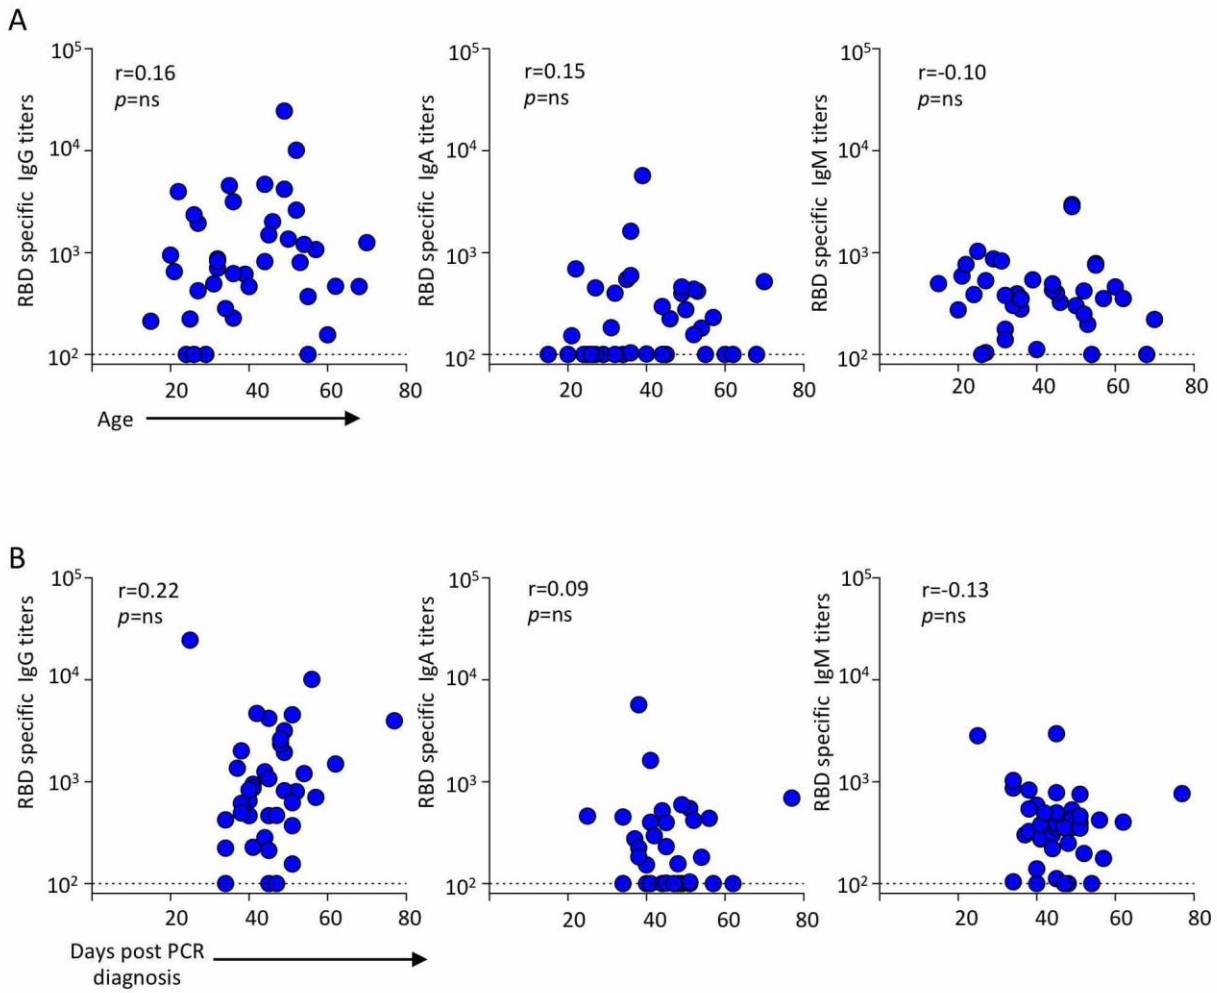

572  
573  
574  
575  
576  
577  
578

**Figure 2**

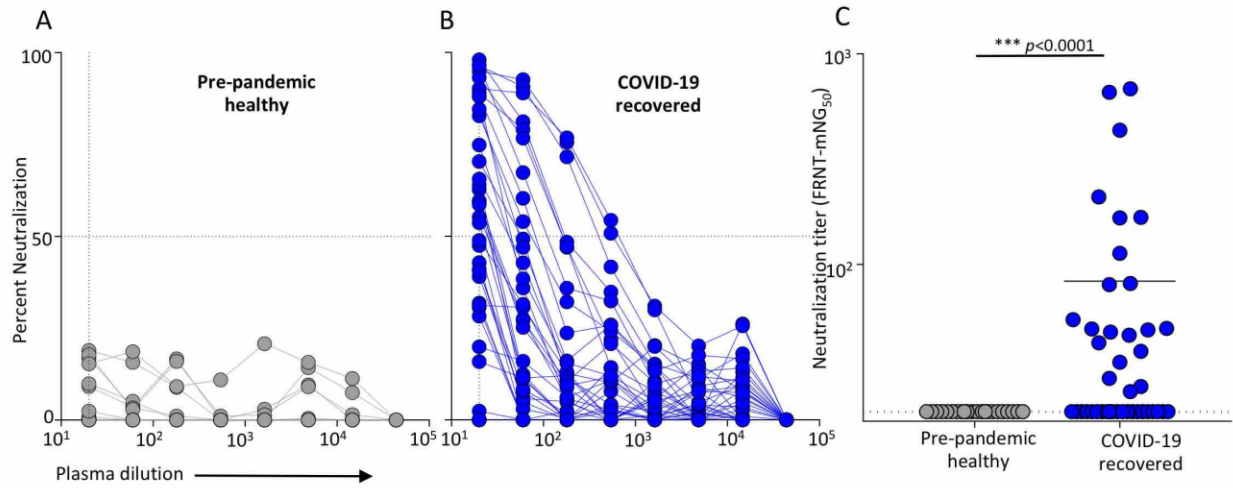

579  
580  
581  
582  
583  
584  
585  
586  
587  
588  
589  
590

**Figure 3**

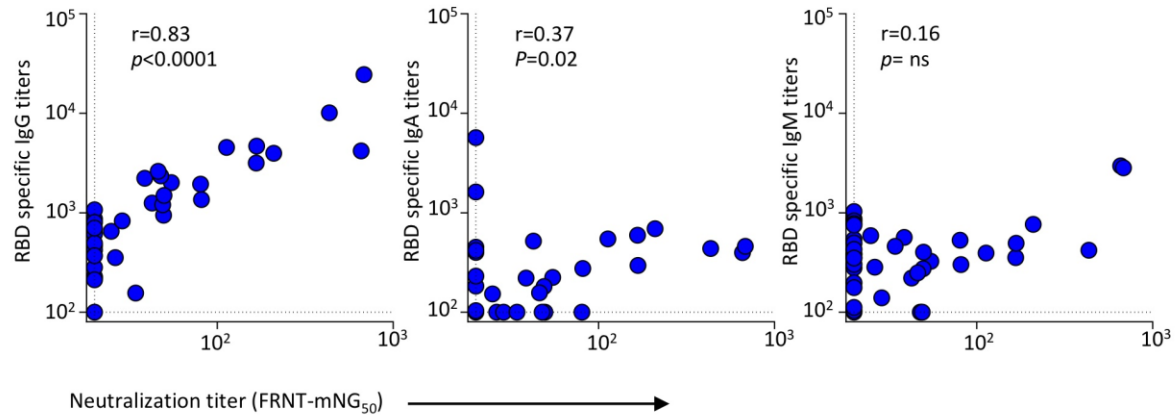

591  
592  
593  
594  
595  
596  
597  
598  
599  
600  
601  
602  
603

**Figure 4**

604

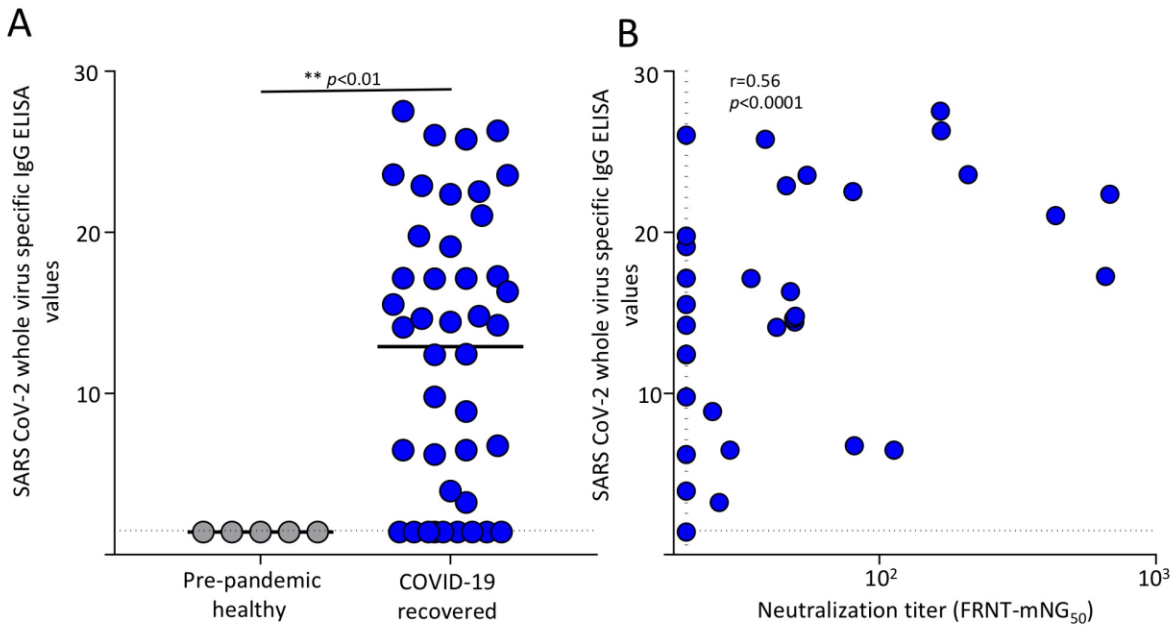

605  
606  
607  
608

**Figure 5**

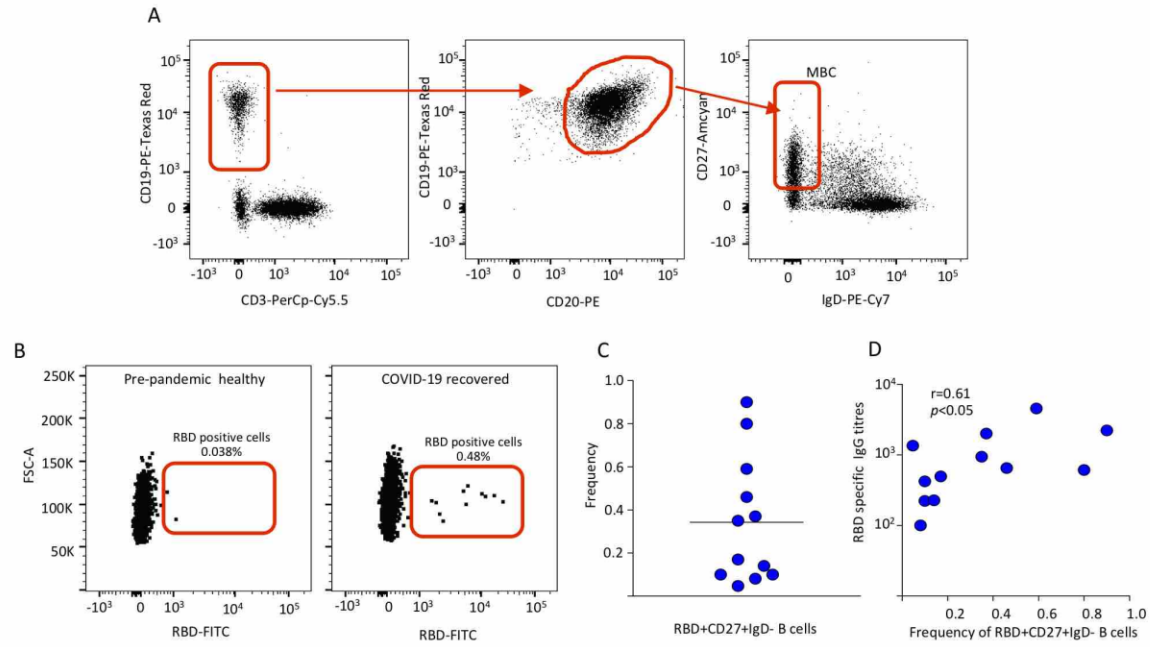

609  
610  
611  
612  
613  
614  
615  
616

**Figure 6**
